# Supplementary material for: Assessment of Causal Direction Between Gut Microbiota–Dependent Metabolites and Cardiometabolic Health: A Bidirectional Mendelian Randomization Analysis
Source: Oxford University Press journal article supplement (doi:10.2337/db19-0153), 2019-06-06
Supplement: db190153supplementarydata.xlsx [file db190153supplementarydata.xlsx]

## Sheet: eTable 1
eTable 1 Characteristics of selected SNPs.
Metabolites	SNP	CHR	POS	RISK_ALLELE	OTHER_ALLELE	MAF	BETA	SE	Pvalue	Closest Gene
Betaine	rs10178297	2	103998526	C	T	0.159669	0.206804	0.0459402	6.74e-06	MRPS9
Betaine	rs10786317	10	83003759	A	G	0.437371	0.158004	0.0345217	4.72e-06	NRG3
Betaine	rs10817686	9	116739671	C	T	0.470655	0.456095	0.0952419	1.68e-06	TNC
Betaine	rs10883712	10	103929295	T	G	0.403856	0.159156	0.0345198	4.02e-06	PPRC1
Betaine	rs11030909	11	29933817	A	C	0.0890405	0.288461	0.0643217	7.3e-06	FSHB
Betaine	rs11224038	11	134231086	T	C	0.0130014	1.21068	0.250897	1.4e-06	LOC89944
Betaine	rs11742447	5	117598798	T	C	0.34453	0.245998	0.0505991	1.16e-06	DMXL1
Betaine	rs1321958	11	31005259	A	G	0.388073	0.15249	0.0341753	8.12e-06	DCDC1
Betaine	rs17815398	18	47967754	G	A	0.0199892	0.838038	0.186726	7.19e-06	MEX3C
Betaine	rs1868264	2	239151212	G	A	0.195369	0.192036	0.0420371	4.92e-06	TRAF3IP1
Betaine	rs2087307	12	10153542	T	G	0.25941	0.171974	0.0386549	8.63e-06	CLEC1A
Betaine	rs2879414	18	47962958	G	A	0.459427	0.152593	0.0334364	5.03e-06	MEX3C
Betaine	rs358538	19	37696665	G	A	0.0546551	0.455873	0.102009	7.86e-06	PDCD5
Betaine	rs6862283	5	78355394	C	T	0.305742	0.192604	0.0361038	9.57e-08	ARSB
Betaine	rs9587723	13	108375283	C	T	0.00318591	3.28354	0.724486	5.84e-06	TNFSF13B
Carnitine	rs10821590	10	61197033	A	G	0.071265	0.598428	0.111937	8.99e-08	SLC16A9
Carnitine	rs1171610	10	61147703	C	T	0.383057	0.195072	0.0361178	6.63e-08	CCDC6
Carnitine	rs1171617	10	61137188	T	G	0.230228	0.417521	0.0396267	5.87e-26	CCDC6
Carnitine	rs11733138	4	22769759	A	G	0.345948	0.225106	0.0497689	6.1e-06	LOC643751
Carnitine	rs16913790	10	61016188	A	G	0.138238	0.215648	0.0480458	7.18e-06	CCDC6
Carnitine	rs274554	5	131752849	T	C	0.15858	0.210812	0.0460423	4.68e-06	LOC441108
Carnitine	rs4656852	1	158071277	C	T	0.0534095	0.507554	0.113868	8.3e-06	FCRL6
Carnitine	rs562672	11	125488674	C	T	0.366342	0.233674	0.0521356	7.39e-06	RPUSD4
Carnitine	rs6108228	20	8926063	T	G	0.405993	0.175224	0.0372539	2.56e-06	PLCB1
Carnitine	rs6959875	7	19788530	G	A	0.301445	0.270154	0.0546209	7.58e-07	TWISTNB
Carnitine	rs7606454	2	45795867	T	C	0.138628	0.234925	0.053084	9.62e-06	SRBD1
Carnitine	rs9879988	3	5284556	G	A	0.163268	0.239135	0.046672	3e-07	ARL8B
Choline	rs10098425	8	106016051	A	G	0.0537913	0.458636	0.103259	8.93e-06	ZFPM2
Choline	rs10819950	9	97975154	A	G	0.316435	0.207834	0.0462358	6.95e-06	SLC35D2
Choline	rs10826197	10	59912647	C	A	0.486752	0.151452	0.0339488	8.15e-06	TFAM
Choline	rs12444044	16	78024057	G	A	0.11218	0.36411	0.080297	5.77e-06	WWOX
Choline	rs2408564	12	90546484	A	G	0.169697	0.249124	0.0516469	1.41e-06	BTG1
Choline	rs4008155	9	38478919	C	T	0.156004	0.215446	0.0467316	4.02e-06	ALDH1B1
Choline	rs4312185	13	75564535	A	T	0.426908	0.155875	0.0347187	7.13e-06	UCHL3
Choline	rs9599459	13	68851492	T	A	0.0116349	1.01541	0.216489	2.73e-06	DACH1
TMAO	rs12221306	10	17041344	A	T	0.386961	0.157561	0.0345298	5.04e-06	RSU1
TMAO	rs13236413	7	156563826	C	T	0.0900774	0.408223	0.0862869	2.23e-06	MNX1
TMAO	rs16917161	8	53128610	A	T	0.0918946	0.261652	0.0590053	9.23e-06	PCMTD1
TMAO	rs17418675	2	55064109	T	C	0.341383	0.155799	0.0351107	9.11e-06	FLJ31438
TMAO	rs2703228	8	5863417	C	G	0.323034	0.216537	0.0410001	1.28e-07	ANGPT2
TMAO	rs3935570	1	19039958	G	T	0.260675	0.22712	0.0432973	1.56e-07	ALDH4A1
TMAO	rs4846884	1	229153698	A	C	0.156395	0.210836	0.0466459	6.19e-06	ARV1
TMAO	rs692588	15	26804716	A	G	0.0305513	2.79397	0.576651	1.27e-06	GOLGA8G
TMAO	rs7302178	12	26899160	A	G	0.16379	0.237074	0.0525337	6.4e-06	C12orf11

## Sheet: eTable 2
eTable 2. Variation of metabollites explained by SNPs
Metabolites	SNP	CHR	POS	RISK_ALLELE	OTHER_ALLELE	MAF	BETA	SE	Pvalue	Closest.Gene	Sample.Size	varianceExplain
Betaine	rs10178297	2	103998526	C	T	0.159669	0.206804	0.0459402	6.74e-06	MRPS9	2075	0.00967149
Betaine	rs10786317	10	83003759	A	G	0.437371	0.158004	0.0345217	4.72e-06	NRG3	2075	0.00999467
Betaine	rs10817686	9	116739671	C	T	0.470655	0.456095	0.0952419	1.68e-06	TNC	2075	0.0109311
Betaine	rs10883712	10	103929295	T	G	0.403856	0.159156	0.0345198	4.02e-06	PPRC1	2075	0.0101407
Betaine	rs11030909	11	29933817	A	C	0.0890405	0.288461	0.0643217	7.3e-06	FSHB	2075	0.00959958
Betaine	rs11224038	11	134231086	T	C	0.0130014	1.21068	0.250897	1.4e-06	LOC89944	2075	0.0110969
Betaine	rs11742447	5	117598798	T	C	0.34453	0.245998	0.0505991	1.16e-06	DMXL1	2075	0.0112627
Betaine	rs1321958	11	31005259	A	G	0.388073	0.15249	0.0341753	8.12e-06	DCDC1	2075	0.0095037
Betaine	rs17815398	18	47967754	G	A	0.0199892	0.838038	0.186726	7.19e-06	MEX3C	2075	0.00961395
Betaine	rs1868264	2	239151212	G	A	0.195369	0.192036	0.0420371	4.92e-06	TRAF3IP1	2075	0.00995723
Betaine	rs2087307	12	10153542	T	G	0.25941	0.171974	0.0386549	8.63e-06	CLEC1A	2075	0.00944879
Betaine	rs2879414	18	47962958	G	A	0.459427	0.152593	0.0334364	5.03e-06	MEX3C	2075	0.00993743
Betaine	rs358538	19	37696665	G	A	0.0546551	0.455873	0.102009	7.86e-06	PDCD5	2075	0.00953307
Betaine	rs6862283	5	78355394	C	T	0.305742	0.192604	0.0361038	9.57e-08	ARSB	2075	0.0135298
Betaine	rs9587723	13	108375283	C	T	0.00318591	3.28354	0.724486	5.84e-06	TNFSF13B	2075	0.00980234
Carnitine	rs10821590	10	61197033	A	G	0.071265	0.598428	0.111937	8.99e-08	SLC16A9	2075	0.0135867
Carnitine	rs1171610	10	61147703	C	T	0.383057	0.195072	0.0361178	6.63e-08	CCDC6	2075	0.0138632
Carnitine	rs1171617	10	61137188	T	G	0.230228	0.417521	0.0396267	5.87e-26	CCDC6	2075	0.0507842
Carnitine	rs11733138	4	22769759	A	G	0.345948	0.225106	0.0497689	6.1e-06	LOC643751	2075	0.00976286
Carnitine	rs16913790	10	61016188	A	G	0.138238	0.215648	0.0480458	7.18e-06	CCDC6	2075	0.00961542
Carnitine	rs274554	5	131752849	T	C	0.15858	0.210812	0.0460423	4.68e-06	LOC441108	2075	0.0100021
Carnitine	rs4656852	1	158071277	C	T	0.0534095	0.507554	0.113868	8.3e-06	FCRL6	2075	0.00948432
Carnitine	rs562672	11	125488674	C	T	0.366342	0.233674	0.0521356	7.39e-06	RPUSD4	2075	0.00958852
Carnitine	rs6108228	20	8926063	T	G	0.405993	0.175224	0.0372539	2.56e-06	PLCB1	2075	0.0105492
Carnitine	rs6959875	7	19788530	G	A	0.301445	0.270154	0.0546209	7.58e-07	TWISTNB	2075	0.0116519
Carnitine	rs7606454	2	45795867	T	C	0.138628	0.234925	0.053084	9.62e-06	SRBD1	2075	0.00935047
Carnitine	rs9879988	3	5284556	G	A	0.163268	0.239135	0.046672	3e-07	ARL8B	2075	0.0124938
Choline	rs10098425	8	106016051	A	G	0.0537913	0.458636	0.103259	8.93e-06	ZFPM2	2075	0.00941792
Choline	rs10819950	9	97975154	A	G	0.316435	0.207834	0.0462358	6.95e-06	SLC35D2	2075	0.00964384
Choline	rs10826197	10	59912647	C	A	0.486752	0.151452	0.0339488	8.15e-06	TFAM	2075	0.00950026
Choline	rs12444044	16	78024057	G	A	0.11218	0.36411	0.080297	5.77e-06	WWOX	2075	0.00981219
Choline	rs2408564	12	90546484	A	G	0.169697	0.249124	0.0516469	1.41e-06	BTG1	2075	0.0110888
Choline	rs4008155	9	38478919	C	T	0.156004	0.215446	0.0467316	4.02e-06	ALDH1B1	2075	0.0101394
Choline	rs4312185	13	75564535	A	T	0.426908	0.155875	0.0347187	7.13e-06	UCHL3	2075	0.00962074
Choline	rs9599459	13	68851492	T	A	0.0116349	1.01541	0.216489	2.73e-06	DACH1	2075	0.0104909
TMAO	rs12221306	10	17041344	A	T	0.386961	0.157561	0.0345298	5.04e-06	RSU1	2075	0.00993468
TMAO	rs13236413	7	156563826	C	T	0.0900774	0.408223	0.0862869	2.23e-06	MNX1	2075	0.0106716
TMAO	rs16917161	8	53128610	A	T	0.0918946	0.261652	0.0590053	9.23e-06	PCMTD1	2075	0.00938756
TMAO	rs17418675	2	55064109	T	C	0.341383	0.155799	0.0351107	9.11e-06	FLJ31438	2075	0.00940004
TMAO	rs2703228	8	5863417	C	G	0.323034	0.216537	0.0410001	1.28e-07	ANGPT2	2075	0.0132641
TMAO	rs3935570	1	19039958	G	T	0.260675	0.22712	0.0432973	1.56e-07	ALDH4A1	2075	0.0130873
TMAO	rs4846884	1	229153698	A	C	0.156395	0.210836	0.0466459	6.19e-06	ARV1	2075	0.00974966
TMAO	rs692588	15	26804716	A	G	0.0305513	2.79397	0.576651	1.27e-06	GOLGA8G	2075	0.011187
TMAO	rs7302178	12	26899160	A	G	0.16379	0.237074	0.0525337	6.4e-06	C12orf11	2075	0.00971923

## Sheet: eTable 3
eTable 3. Mendelian randomization of gut microbiota dependant metalolites and cardiometabolic disease
Metabolites	Simple		Weighted		IVW		MBE		Egger-MR		(intercept)
Betaine, per 10 unit	OR(95%CI)	P-value	OR(95%CI)	P-value	OR(95%CI)	P-value	OR(95%CI)	P-value	OR(95%CI)	P-value	Beta(95%CI)	P-value
T2DM	0.81(0.50,1.32)	0.401	0.66(0.41,1.06)	0.086	0.68(0.48,0.95)	0.023	0.86(0.41,1.82)	0.697	0.54(0.29,1.01)	0.055	0.070(-0.090,0.230)	0.423
AF	1.06(0.73,1.55)	0.761	1.03(0.84,1.27)	0.756	1.09(0.90,1.34)	0.354	1.08(0.90,1.31)	0.381	1.13(0.89,1.42)	0.323	-0.030(-0.150,0.100)	0.679
CAD	1.32(0.93,1.88)	0.112	1.07(0.76,1.51)	0.707	1.12(0.88,1.42)	0.379	1.03(0.68,1.57)	0.898	0.91(0.55,1.51)	0.724	0.060(-0.070,0.190)	0.376
MI	1.27(0.83,1.95)	0.281	1.17(0.79,1.75)	0.426	1.21(0.92,1.60)	0.17	1.20(0.79,1.80)	0.382	0.85(0.49,1.49)	0.575	0.100(-0.040,0.250)	0.158
Stroke	0.94(0.53,1.67)	0.826	1.00(0.58,1.75)	0.991	0.95(0.64,1.40)	0.797	1.15(0.63,2.10)	0.654	1.09(0.51,2.32)	0.82	-0.040(-0.250,0.160)	0.671
CKD	0.68(0.35,1.32)	0.254	0.66(0.33,1.34)	0.243	0.79(0.45,1.38)	0.404	0.60(0.26,1.39)	0.231	0.42(0.10,1.86)	0.256	0.150(-0.180,0.470)	0.375
Carnitine, per 10 unit
T2DM	0.89(0.52,1.52)	0.667	0.84(0.48,1.51)	0.567	0.88(0.59,1.32)	0.545	0.79(0.34,1.82)	0.578	0.91(0.22,3.71)	0.895	-0.010(-0.360,0.350)	0.964
AF	0.91(0.60,1.39)	0.682	0.91(0.61,1.38)	0.663	1.05(0.77,1.43)	0.746	0.79(0.47,1.30)	0.349	0.84(0.36,1.95)	0.692	0.070(-0.170,0.310)	0.579
CAD	0.79(0.59,1.07)	0.134	0.76(0.56,1.04)	0.083	0.80(0.64,1.02)	0.072	0.75(0.48,1.17)	0.204	0.68(0.36,1.30)	0.244	0.050(-0.130,0.230)	0.587
MI	0.80(0.57,1.14)	0.215	0.75(0.53,1.04)	0.084	0.89(0.68,1.15)	0.371	0.71(0.50,1.02)	0.066	0.58(0.29,1.19)	0.139	0.130(-0.070,0.330)	0.217
Stroke	0.94(0.55,1.60)	0.827	1.14(0.68,1.93)	0.623	1.07(0.73,1.58)	0.716	1.09(0.55,2.16)	0.791	1.42(0.50,4.10)	0.509	-0.090(-0.390,0.220)	0.571
CKD	0.66(0.38,1.17)	0.162	0.66(0.37,1.17)	0.16	0.87(0.58,1.31)	0.501	0.58(0.26,1.34)	0.201	0.64(0.19,2.18)	0.48	0.090(-0.240,0.420)	0.608
Choline, per 10 unit
T2DM	1.58(0.72,3.46)	0.255	1.54(0.71,3.32)	0.277	1.84(1.00,3.42)	0.05	1.19(0.45,3.06)	0.731	0.81(0.17,3.82)	0.788	0.200(-0.150,0.550)	0.254
AF	1.04(0.49,2.20)	0.913	1.48(0.84,2.56)	0.169	1.13(0.68,1.86)	0.649	1.57(1.05,2.36)	0.028	1.88(0.95,3.74)	0.071	-0.210(-0.430,0.010)	0.059
CAD	1.25(0.83,1.88)	0.286	1.02(0.71,1.45)	0.926	1.07(0.81,1.42)	0.618	0.99(0.70,1.38)	0.944	0.94(0.59,1.51)	0.797	0.050(-0.090,0.200)	0.486
MI	1.03(0.65,1.63)	0.9	0.92(0.62,1.38)	0.702	1.02(0.75,1.40)	0.889	0.90(0.63,1.30)	0.58	0.87(0.52,1.46)	0.605	0.060(-0.100,0.220)	0.451
Stroke	1.20(0.58,2.48)	0.625	1.03(0.52,2.03)	0.928	1.09(0.65,1.82)	0.744	0.92(0.42,2.03)	0.846	0.75(0.30,1.82)	0.519	0.140(-0.130,0.400)	0.31
CKD	0.70(0.30,1.62)	0.402	0.67(0.28,1.58)	0.364	0.73(0.35,1.52)	0.407	0.63(0.21,1.82)	0.387	0.32(0.02,4.62)	0.405	0.180(-0.370,0.720)	0.53
TMAO, per 10 unit
T2DM	1.00(0.51,1.95)	0.999	1.20(0.74,1.95)	0.458	0.96(0.59,1.57)	0.863	1.27(0.77,2.12)	0.345	1.51(0.80,2.83)	0.2	-0.190(-0.380,0.000)	0.054
AF	0.98(0.59,1.62)	0.932	1.04(0.79,1.36)	0.792	0.99(0.79,1.26)	0.961	1.05(0.81,1.35)	0.722	1.06(0.79,1.42)	0.708	-0.050(-0.180,0.080)	0.483
CAD	0.91(0.57,1.45)	0.694	0.98(0.61,1.58)	0.942	1.00(0.70,1.43)	0.986	1.05(0.55,2.01)	0.871	2.05(0.61,6.89)	0.245	-0.170(-0.450,0.110)	0.226
MI	1.19(0.72,1.95)	0.503	1.13(0.68,1.86)	0.635	1.08(0.73,1.60)	0.708	1.27(0.76,2.16)	0.359	1.11(0.29,4.26)	0.879	-0.010(-0.310,0.300)	0.965
Stroke	1.04(0.48,2.27)	0.91	1.26(0.61,2.59)	0.532	0.94(0.53,1.65)	0.83	1.23(0.63,2.39)	0.541	1.31(0.45,3.78)	0.62	-0.100(-0.390,0.180)	0.466
CKD	1.15(0.54,2.44)	0.705	1.20(0.55,2.59)	0.651	1.08(0.59,1.99)	0.794	1.25(0.49,3.16)	0.652	1.11(0.11,11.70)	0.931	-0.010(-0.530,0.520)	0.984

## Sheet: eTable 4
eTable 4. Mendelian randomization of gut microbiota dependant metalolites and cardiometabolic traits
Metabolites	Simple		Weighted		IVW		MBE		Egger-MR		(intercept)
Betaine, per 10 unit	Beta±SE	P-value	Beta±SE	P-value	Beta±SE	P-value	Beta±SE	P-value	Beta±SE	P-value	Beta(95%CI)	P-value
Fasting Glucose	0.06±0.08	0.474	0.05±0.08	0.496	0.06±0.06	0.325	0.05±0.11	0.674	0.08±0.14	0.549	-0.01(-0.07,0.05)	0.844
Fasting Insulin	0.13±0.09	0.151	0.12±0.09	0.206	0.10±0.07	0.159	0.18±0.14	0.204	-0.09±0.16	0.551	0.05(-0.02,0.11)	0.186
HbA1C1	0.08±0.08	0.321	0.03±0.08	0.734	0.05±0.06	0.43	0.02±0.12	0.877	-0.09±0.14	0.529	0.03(-0.03,0.09)	0.278
HOMA_B	0.14±0.08	0.06	0.14±0.08	0.066	0.07±0.06	0.227	0.18±0.11	0.11	-0.12±0.13	0.351	0.05(-0.01,0.10)	0.105
HOMA_IR	0.13±0.09	0.15	0.13±0.09	0.167	0.09±0.07	0.178	0.18±0.12	0.16	-0.12±0.16	0.445	0.05(-0.02,0.12)	0.138
Proinsulin	-0.01±0.16	0.945	0.03±0.16	0.844	-0.03±0.11	0.791	0.06±0.23	0.778	0.15±0.26	0.556	-0.05(-0.16,0.07)	0.429
Two hr Glucose	0.12±0.43	0.783	0.12±0.42	0.777	0.12±0.32	0.708	0.05±0.82	0.956	-0.17±0.80	0.83	0.07(-0.26,0.39)	0.691
BMI	0.03±0.07	0.637	0.09±0.06	0.157	0.02±0.06	0.686	0.07±0.07	0.314	-0.02±0.09	0.815	0.02(-0.03,0.07)	0.512
Body fat %	0.07±0.10	0.496	0.01±0.10	0.882	0.07±0.07	0.312	0.01±0.13	0.972	0.02±0.11	0.864	0.02(-0.04,0.08)	0.52
eGFRcrea_DM	0.01±0.08	0.987	-0.05±0.08	0.586	0.05±0.06	0.367	-0.07±0.10	0.503	0.01±0.15	0.925	0.01(-0.06,0.07)	0.791
eGFRcrea_overall	0.01±0.02	0.654	0.03±0.02	0.228	0.01±0.02	0.792	0.03±0.03	0.353	0.08±0.06	0.152	-0.02(-0.04,0.01)	0.151
eGFRcys_overall	-0.02±0.05	0.68	-0.06±0.04	0.18	-0.04±0.03	0.307	-0.08±0.06	0.207	-0.10±0.09	0.264	0.02(-0.02,0.06)	0.425
WHRadjBMI	-0.10±0.09	0.279	-0.10±0.09	0.303	-0.05±0.08	0.509	-0.11±0.13	0.402	-0.07±0.17	0.67	0.01(-0.07,0.08)	0.878
HDL	0.12±0.12	0.312	0.12±0.12	0.302	0.01±0.10	0.953	0.19±0.15	0.202	0.32±0.22	0.143	-0.08(-0.17,0.02)	0.11
LDL	0.07±0.13	0.604	0.10±0.13	0.431	0.01±0.12	0.94	0.17±0.19	0.372	0.17±0.28	0.542	-0.04(-0.16,0.08)	0.522
Leptin	-0.02±0.10	0.882	-0.01±0.11	0.894	-0.08±0.08	0.272	-0.01±0.15	0.966	-0.24±0.17	0.151	0.04(-0.03,0.12)	0.292
Resting Heat Rate	0.52±0.66	0.432	-0.18±0.44	0.676	-0.11±0.31	0.729	-0.28±0.40	0.477	-0.48±0.37	0.203	0.31(-0.03,0.65)	0.078
TC	-0.07±0.13	0.587	-0.05±0.13	0.701	-0.01±0.12	0.906	-0.06±0.16	0.734	0.08±0.28	0.765	-0.02(-0.14,0.09)	0.7
TG	-0.08±0.11	0.474	-0.08±0.11	0.462	0.01±0.08	0.934	-0.10±0.17	0.566	-0.11±0.18	0.542	0.03(-0.05,0.10)	0.475
Carnitine, per 10 unit
Fasting Glucose	-0.03±0.08	0.678	-0.02±0.08	0.819	-0.04±0.08	0.608	0.03±0.11	0.785	-0.07±0.25	0.788	0.01(-0.12,0.13)	0.909
Fasting Insulin	-0.09±0.08	0.244	-0.03±0.08	0.702	-0.02±0.06	0.716	0.12±0.13	0.343	0.16±0.18	0.378	-0.05(-0.14,0.04)	0.29
HbA1C1	0.02±0.07	0.767	0.02±0.07	0.822	0.01±0.05	0.942	0.01±0.11	0.942	-0.11±0.16	0.508	0.03(-0.05,0.11)	0.499
HOMA_B	0.04±0.07	0.549	0.06±0.07	0.364	0.03±0.06	0.527	0.10±0.10	0.306	0.32±0.15	0.034	-0.08(-0.16,0.00)	0.045
HOMA_IR	-0.06±0.09	0.482	0.00±0.09	0.998	0.01±0.06	0.879	-0.13±0.16	0.42	0.27±0.18	0.141	-0.07(-0.17,0.02)	0.133
Proinsulin	0.26±0.15	0.08	0.26±0.14	0.077	0.09±0.11	0.436	0.27±0.19	0.16	0.04±0.31	0.892	0.01(-0.15,0.18)	0.876
Two hr Glucose	0.22±0.39	0.571	0.36±0.40	0.374	0.35±0.29	0.216	0.37±0.56	0.504	0.31±0.85	0.718	0.01(-0.42,0.45)	0.954
BMI	-0.04±0.07	0.581	-0.01±0.07	0.863	-0.06±0.05	0.246	0.01±0.09	0.933	0.05±0.15	0.753	-0.03(-0.11,0.05)	0.45
Body fat %	-0.04±0.12	0.776	0.06±0.12	0.591	0.01±0.10	0.997	0.18±0.18	0.324	0.49±0.26	0.06	-0.14(-0.27,0.00)	0.046
eGFRcrea_DM	-0.04±0.07	0.52	-0.05±0.07	0.509	-0.03±0.06	0.636	-0.09±0.10	0.372	-0.17±0.17	0.316	0.04(-0.05,0.13)	0.37
eGFRcrea_overall	-0.01±0.02	0.709	0.01±0.02	0.417	0.01±0.01	0.536	0.02±0.02	0.438	0.06±0.04	0.096	-0.01(-0.03,0.00)	0.123
eGFRcys_overall	0.02±0.04	0.69	0.01±0.04	0.831	0.01±0.03	0.642	0.02±0.06	0.737	0.03±0.09	0.767	0.01(-0.05,0.04)	0.882
WHRadjBMI	0.01±0.09	0.967	-0.04±0.09	0.674	-0.07±0.06	0.294	0.04±0.12	0.743	-0.15±0.18	0.419	0.02(-0.07,0.12)	0.629
HDL	-0.05±0.10	0.598	-0.02±0.10	0.849	-0.01±0.07	0.919	-0.03±0.13	0.81	0.06±0.22	0.78	-0.02(-0.13,0.09)	0.74
LDL	-0.04±0.10	0.719	-0.05±0.10	0.62	-0.07±0.08	0.347	-0.05±0.16	0.752	0.04±0.22	0.868	-0.03(-0.15,0.09)	0.605
Leptin	0.04±0.10	0.702	0.00±0.10	0.984	0.03±0.07	0.644	-0.04±0.15	0.78	-0.29±0.21	0.18	0.09(-0.02,0.20)	0.111
Resting Heat Rate	0.34±0.67	0.613	0.09±0.64	0.889	-0.15±0.48	0.75	0.14±0.82	0.867	0.25±1.02	0.808	-0.14(-0.76,0.48)	0.654
TC	-0.11±0.10	0.277	-0.13±0.10	0.208	-0.09±0.07	0.242	-0.13±0.14	0.378	0.03±0.22	0.896	-0.03(-0.15,0.08)	0.575
TG	-0.16±0.09	0.077	-0.17±0.10	0.073	-0.17±0.07	0.012	-0.17±0.15	0.241	-0.07±0.20	0.708	-0.03(-0.13,0.08)	0.607
Choline, per 10 unit
Fasting Glucose	0.13±0.10	0.192	0.14±0.11	0.205	0.16±0.09	0.065	0.10±0.11	0.349	0.18±0.19	0.34	0.01(-0.10,0.09)	0.922
Fasting Insulin	-0.09±0.10	0.411	0.04±0.10	0.698	-0.06±0.08	0.439	0.06±0.12	0.647	0.06±0.15	0.712	-0.03(-0.11,0.04)	0.365
HbA1C1	0.03±0.09	0.751	0.06±0.09	0.501	-0.02±0.07	0.818	0.11±0.17	0.526	0.10±0.18	0.588	-0.03(-0.11,0.05)	0.484
HOMA_B	-0.09±0.09	0.284	-0.04±0.08	0.656	-0.05±0.06	0.485	-0.03±0.07	0.694	-0.01±0.11	0.961	-0.01(-0.07,0.05)	0.675
HOMA_IR	0.05±0.11	0.616	0.06±0.11	0.591	0.01±0.08	0.974	0.09±0.11	0.452	0.10±0.15	0.497	-0.03(-0.11,0.04)	0.41
Proinsulin	-0.17±0.20	0.383	-0.18±0.20	0.383	-0.19±0.18	0.291	-0.16±0.26	0.548	-0.23±0.41	0.576	0.01(-0.18,0.20)	0.918
Two hr Glucose	0.65±0.52	0.209	0.33±0.50	0.505	0.32±0.39	0.415	-0.39±0.74	0.601	-0.35±0.79	0.661	0.19(-0.19,0.57)	0.329
BMI	0.02±0.10	0.863	0.12±0.10	0.238	0.04±0.08	0.605	0.18±0.17	0.272	0.33±0.15	0.029	-0.08(-0.16,-0.01)	0.027
Body fat %	-0.23±0.15	0.132	-0.23±0.15	0.137	-0.28±0.11	0.013	-0.22±0.18	0.228	-0.22±0.24	0.359	-0.02(-0.13,0.10)	0.771
eGFRcrea_DM	0.04±0.11	0.75	0.05±0.12	0.682	0.07±0.09	0.475	0.03±0.17	0.84	0.23±0.36	0.525	-0.04(-0.18,0.11)	0.639
eGFRcrea_overall	-0.01±0.03	0.646	-0.03±0.02	0.307	-0.02±0.02	0.38	-0.06±0.05	0.205	-0.06±0.04	0.2	0.01(-0.01,0.03)	0.33
eGFRcys_overall	0.09±0.06	0.123	0.09±0.06	0.132	0.10±0.05	0.034	0.05±0.11	0.67	-0.03±0.19	0.879	0.03(-0.05,0.10)	0.465
WHRadjBMI	-0.08±0.11	0.457	-0.08±0.11	0.49	-0.04±0.09	0.683	-0.08±0.14	0.549	-0.01±0.18	0.938	-0.01(-0.09,0.08)	0.885
HDL	0.20±0.13	0.127	0.13±0.13	0.324	0.10±0.10	0.356	0.29±0.19	0.125	-0.12±0.22	0.597	0.06(-0.05,0.16)	0.274
LDL	0.25±0.15	0.101	0.21±0.15	0.177	0.22±0.13	0.094	0.15±0.18	0.42	0.11±0.29	0.704	0.03(-0.11,0.17)	0.679
Leptin	0.07±0.14	0.62	-0.05±0.14	0.747	-0.01±0.13	0.912	-0.01±0.15	0.923	-0.05±0.27	0.863	0.01(-0.13,0.15)	0.889
Resting Heat Rate	-1.48±0.94	0.115	-1.53±0.86	0.077	-1.03±0.87	0.237	-1.53±0.71	0.032	-2.72±1.31	0.037	0.66(-0.14,1.47)	0.106
TC	0.09±0.15	0.535	0.09±0.15	0.56	0.10±0.13	0.433	0.06±0.16	0.737	-0.04±0.29	0.886	0.04(-0.10,0.18)	0.572
TG	0.07±0.12	0.549	0.07±0.13	0.602	0.08±0.11	0.476	0.06±0.15	0.672	0.03±0.24	0.911	0.01(-0.10,0.13)	0.813
TMAO, per 10 unit
Fasting Glucose	-0.15±0.10	0.13	-0.15±0.10	0.133	-0.02±0.08	0.775	-0.16±0.16	0.296	0.19±0.29	0.515	-0.05(-0.17,0.08)	0.451
Fasting Insulin	0.04±0.11	0.739	-0.02±0.11	0.838	-0.02±0.08	0.768	0.09±0.21	0.661	-0.41±0.30	0.173	0.09(-0.04,0.21)	0.182
HbA1C1	-0.02±0.07	0.791	-0.02±0.06	0.695	-0.01±0.05	0.866	-0.03±0.05	0.597	-0.02±0.07	0.76	0.01(-0.04,0.05)	0.787
HOMA_B	0.06±0.10	0.516	0.04±0.10	0.699	0.02±0.09	0.858	0.07±0.25	0.772	-0.34±0.31	0.271	0.08(-0.05,0.21)	0.23
HOMA_IR	-0.01±0.11	0.941	-0.03±0.11	0.77	-0.02±0.08	0.772	0.03±0.26	0.913	-0.30±0.31	0.327	0.06(-0.07,0.19)	0.349
Proinsulin	0.04±0.18	0.812	0.01±0.16	0.977	-0.01±0.12	0.936	-0.05±0.21	0.808	-0.17±0.20	0.401	0.05(-0.05,0.16)	0.322
Two hr Glucose	0.51±0.48	0.283	0.49±0.49	0.31	0.31±0.39	0.438	0.50±0.76	0.515	0.20±1.52	0.894	0.02(-0.62,0.66)	0.944
BMI	0.11±0.09	0.197	0.02±0.07	0.757	0.06±0.07	0.411	0.01±0.07	0.897	-0.07±0.10	0.52	0.05(-0.01,0.11)	0.114
Body fat %	0.16±0.13	0.228	0.10±0.10	0.325	0.13±0.08	0.112	0.05±0.11	0.648	-0.01±0.12	0.961	0.06(-0.01,0.13)	0.113
eGFRcrea_DM	0.11±0.09	0.222	0.12±0.09	0.216	0.05±0.09	0.552	0.13±0.10	0.186	0.13±0.34	0.704	-0.02(-0.16,0.13)	0.812
eGFRcrea_overall	-0.01±0.02	0.682	-0.01±0.02	0.488	-0.02±0.01	0.186	-0.01±0.02	0.49	-0.01±0.02	0.58	0.01(-0.02,0.01)	0.677
eGFRcys_overall	0.01±0.05	0.983	0.01±0.05	0.927	-0.01±0.04	0.844	0.01±0.05	0.959	0.25±0.14	0.078	-0.06(-0.12,0.01)	0.059
WHRadjBMI	-0.06±0.10	0.56	-0.03±0.11	0.761	0.01±0.09	0.988	-0.04±0.12	0.76	0.14±0.31	0.638	-0.03(-0.17,0.10)	0.627
HDL	-0.01±0.13	0.947	-0.01±0.13	0.964	0.03±0.10	0.744	-0.05±0.22	0.838	0.48±0.37	0.196	-0.10(-0.26,0.06)	0.211
LDL	0.08±0.13	0.522	0.08±0.13	0.544	0.05±0.11	0.608	0.09±0.18	0.628	-0.15±0.40	0.708	0.05(-0.12,0.22)	0.595
Leptin	0.03±0.13	0.838	0.07±0.13	0.623	-0.07±0.12	0.535	0.08±0.16	0.621	-0.25±0.45	0.579	0.04(-0.15,0.23)	0.681
Resting Heat Rate	0.05±0.92	0.956	-0.31±0.44	0.478	-0.14±0.45	0.757	-0.29±0.44	0.499	-0.34±0.57	0.545	0.18(-0.37,0.72)	0.526
TC	0.06±0.12	0.617	0.06±0.13	0.626	0.05±0.10	0.652	0.09±0.18	0.633	-0.08±0.39	0.831	0.03(-0.14,0.20)	0.728
TG	0.01±0.12	0.952	0.01±0.13	0.962	0.05±0.10	0.636	-0.06±0.19	0.766	0.28±0.35	0.423	-0.05(-0.20,0.10)	0.485

## Sheet: eTable 5
eTable 5. Association of TMAO SNPs with dietary factors
Trait	Variant	Chromosome	Position	Eff. allele	beta	pv	MAF	HWE	imp. score
Alcohol drinker status	rs12221306	10	17001338	A	0.0011114	0.18084	0.360158	0.4742	0.998839
Alcohol drinker status	rs13236413	7	156871065	T	0.00026133	0.84497	0.100145	0.6929	0.977149
Alcohol drinker status	rs16917161	8	52966057	A	-0.0010147	0.4102	0.119265	0.2535	0.9881
Alcohol drinker status	rs17418675	2	55210605	C	-0.00027058	0.74945	0.335543	0.9451	0.993896
Alcohol drinker status	rs2703228	8	5876009	G	-0.00011651	0.89206	0.319607	0.1747	0.985174
Alcohol drinker status	rs3935570	1	19167371	T	-2.7296e-05	0.9759	0.267939	0.2443	0.995124
Alcohol drinker status	rs4846884	1	231087075	C	-0.0012955	0.25821	0.141117	0.3794	0.998045
Alcohol drinker status	rs692588	15	29005675	G	0.00065045	0.80137	0.0258928	0.9715	0.914204
Alcohol drinker status	rs7302178	12	27007893	G	-0.00055659	0.62041	0.14919	0.8129	0.989623
Fresh fruit intake	rs12221306	10	17001338	A	-0.0019189	0.52652	0.360158	0.4742	0.998839
Fresh fruit intake	rs13236413	7	156871065	T	0.0011898	0.80743	0.100145	0.6929	0.977149
Fresh fruit intake	rs16917161	8	52966057	A	0.00080843	0.85725	0.119265	0.2535	0.9881
Fresh fruit intake	rs17418675	2	55210605	C	0.0073722	0.017304	0.335543	0.9451	0.993896
Fresh fruit intake	rs2703228	8	5876009	G	0.0042117	0.1787	0.319607	0.1747	0.985174
Fresh fruit intake	rs3935570	1	19167371	T	-0.00088652	0.78823	0.267939	0.2443	0.995124
Fresh fruit intake	rs4846884	1	231087075	C	-0.0038407	0.35879	0.141117	0.3794	0.998045
Fresh fruit intake	rs692588	15	29005675	G	0.012216	0.19497	0.0258928	0.9715	0.914204
Fresh fruit intake	rs7302178	12	27007893	G	0.0020471	0.61744	0.14919	0.8129	0.989623
Coffee intake	rs12221306	10	17001338	A	9.9999e-05	0.98147	0.360158	0.4742	0.998839
Coffee intake	rs13236413	7	156871065	T	0.0062286	0.37048	0.100145	0.6929	0.977149
Coffee intake	rs16917161	8	52966057	A	0.0088745	0.16505	0.119265	0.2535	0.9881
Coffee intake	rs17418675	2	55210605	C	-0.0013919	0.7516	0.335543	0.9451	0.993896
Coffee intake	rs2703228	8	5876009	G	-0.0044279	0.3202	0.319607	0.1747	0.985174
Coffee intake	rs3935570	1	19167371	T	0.0015414	0.74225	0.267939	0.2443	0.995124
Coffee intake	rs4846884	1	231087075	C	0.0027016	0.64944	0.141117	0.3794	0.998045
Coffee intake	rs692588	15	29005675	G	0.0088955	0.50779	0.0258928	0.9715	0.914204
Coffee intake	rs7302178	12	27007893	G	-0.0025076	0.66706	0.14919	0.8129	0.989623
Pork intake	rs12221306	10	17001338	A	0.0010555	0.47829	0.360158	0.4742	0.998839
Pork intake	rs13236413	7	156871065	T	-0.0018813	0.43254	0.100145	0.6929	0.977149
Pork intake	rs16917161	8	52966057	A	-0.0021361	0.33378	0.119265	0.2535	0.9881
Pork intake	rs17418675	2	55210605	C	0.002172	0.15298	0.335543	0.9451	0.993896
Pork intake	rs2703228	8	5876009	G	0.00036148	0.81443	0.319607	0.1747	0.985174
Pork intake	rs3935570	1	19167371	T	0.0011034	0.4959	0.267939	0.2443	0.995124
Pork intake	rs4846884	1	231087075	C	-0.0026535	0.19654	0.141117	0.3794	0.998045
Pork intake	rs692588	15	29005675	G	-0.0092101	0.047017	0.0258928	0.9715	0.914204
Pork intake	rs7302178	12	27007893	G	0.00092536	0.64618	0.14919	0.8129	0.989623
Beef intake	rs12221306	10	17001338	A	0.0018623	0.27615	0.360158	0.4742	0.998839
Beef intake	rs13236413	7	156871065	T	-0.0008509	0.75721	0.100145	0.6929	0.977149
Beef intake	rs16917161	8	52966057	A	-0.0030793	0.22507	0.119265	0.2535	0.9881
Beef intake	rs17418675	2	55210605	C	-0.00040551	0.81638	0.335543	0.9451	0.993896
Beef intake	rs2703228	8	5876009	G	0.0018938	0.2843	0.319607	0.1747	0.985174
Beef intake	rs3935570	1	19167371	T	-0.0019359	0.29838	0.267939	0.2443	0.995124
Beef intake	rs4846884	1	231087075	C	-0.00087059	0.71228	0.141117	0.3794	0.998045
Beef intake	rs692588	15	29005675	G	-0.0024387	0.6469	0.0258928	0.9715	0.914204
Beef intake	rs7302178	12	27007893	G	-0.0013324	0.56486	0.14919	0.8129	0.989623
Oily fish intake	rs12221306	10	17001338	A	-0.0012222	0.51273	0.360158	0.4742	0.998839
Oily fish intake	rs13236413	7	156871065	T	0.0017093	0.56971	0.100145	0.6929	0.977149
Oily fish intake	rs16917161	8	52966057	A	0.00083736	0.76253	0.119265	0.2535	0.9881
Oily fish intake	rs17418675	2	55210605	C	0.00012945	0.94591	0.335543	0.9451	0.993896
Oily fish intake	rs2703228	8	5876009	G	-0.0008366	0.66485	0.319607	0.1747	0.985174
Oily fish intake	rs3935570	1	19167371	T	-0.00083065	0.68289	0.267939	0.2443	0.995124
Oily fish intake	rs4846884	1	231087075	C	0.00044719	0.86231	0.141117	0.3794	0.998045
Oily fish intake	rs692588	15	29005675	G	0.0038589	0.50686	0.0258928	0.9715	0.914204
Oily fish intake	rs7302178	12	27007893	G	0.0018435	0.46576	0.14919	0.8129	0.989623
Data were extracted from UK Biobank GWAS summary statistis.(http://geneatlas.roslin.ed.ac.uk)

## Sheet: eTable 6
eTable 6. Causal effects of cardiometabolic diseases on gut dependant metabolites
	TMAO		Choline		Carnitine		Betaine
	Beta±SE	P-value	Beta±SE	P-value	Beta±SE	P-value	Beta±SE	P-value
Atrial fibrillation
Simple median	-0.125±0.088	0.157	0.004±0.091	0.964	-0.085±0.087	0.329	-0.095±0.089	0.289
Weighted median	0.093±0.088	0.295	-0.077±0.088	0.381	0.018±0.088	0.842	-0.103±0.092	0.26
IVW	-0.004±0.051	0.942	-0.036±0.057	0.522	-0.076±0.051	0.14	-0.069±0.054	0.203
MR-Egger	0.022±0.097	0.823	0.043±0.108	0.688	-0.029±0.097	0.766	-0.089±0.102	0.386
(intercept)	-0.002±0.008	0.757	-0.008±0.009	0.382	-0.005±0.008	0.567	0.002±0.008	0.819
Type 2 diabetes
Simple median	0.045±0.062	0.475	0.049±0.058	0.404	0.025±0.057	0.66	-0.187±0.066	0.005
Weighted median	0.202±0.057	<0.0001	0.049±0.054	0.368	0.023±0.054	0.67	0.05±0.056	0.37
IVW	0.13±0.036	<0.0001	0.001±0.036	0.969	0.054±0.036	0.133	-0.111±0.035	0.002
MR-Egger	0.233±0.073	0.001	0.102±0.072	0.159	0.056±0.072	0.435	0.102±0.071	0.154
(intercept)	-0.015±0.009	0.103	-0.014±0.009	0.11	0±0.009	0.966	-0.03±0.009	0.001
Stroke
Simple median	0.007±0.109	0.95	-0.027±0.124	0.827	0.134±0.111	0.228	0.052±0.118	0.656
Weighted median	0.011±0.099	0.908	-0.125±0.107	0.244	0.075±0.099	0.45	-0.133±0.099	0.178
IVW	0.044±0.067	0.51	0.056±0.086	0.515	0.128±0.068	0.059	0.025±0.067	0.707
MR-Egger	0.027±0.116	0.812	-0.066±0.148	0.655	0.036±0.117	0.761	-0.178±0.116	0.125
(intercept)	0.002±0.012	0.858	0.016±0.016	0.31	0.012±0.012	0.33	0.026±0.012	0.031
CAD
Simple median	-0.11±0.102	0.282	0.174±0.102	0.088	0.017±0.099	0.863	-0.042±0.091	0.642
Weighted median	0.034±0.1	0.736	-0.064±0.104	0.54	0.029±0.095	0.759	0.04±0.09	0.655
IVW	0.005±0.073	0.944	0.062±0.077	0.42	0.024±0.06	0.686	0.039±0.06	0.513
MR-Egger	-0.089±0.177	0.613	-0.367±0.178	0.039	-0.077±0.146	0.596	0.014±0.145	0.921
(intercept)	0.009±0.015	0.557	0.041±0.016	0.008	0.01±0.013	0.444	0.002±0.013	0.852
MI
Simple median	0.106±0.096	0.272	0.044±0.108	0.685	-0.026±0.092	0.78	-0.099±0.087	0.256
Weighted median	0.118±0.091	0.193	0.062±0.102	0.545	-0.023±0.094	0.805	-0.008±0.087	0.93
IVW	0.018±0.068	0.793	0.083±0.076	0.277	0.007±0.059	0.908	-0.004±0.059	0.947
MR-Egger	-0.028±0.172	0.87	0.347±0.191	0.069	-0.031±0.149	0.836	0.022±0.147	0.879
(intercept)	0.004±0.014	0.771	-0.024±0.016	0.132	0.003±0.012	0.783	-0.002±0.012	0.846
CKD
Simple median	0.866±0.251	0.001	-0.125±0.195	0.522	0.339±0.2	0.089	-0.073±0.2	0.715
Weighted median	0.295±0.198	0.137	0.06±0.186	0.746	0.427±0.192	0.026	0.075±0.193	0.697
IVW	0.483±0.168	0.004	0.039±0.144	0.787	0.257±0.149	0.085	0.085±0.123	0.49
MR-Egger	-0.299±0.335	0.372	0.236±0.332	0.476	0.951±0.296	0.001	0.078±0.279	0.779
(intercept)	0.06±0.023	0.009	-0.015±0.023	0.507	-0.054±0.021	0.009	0.001±0.019	0.979
